# Supplementary material
Source: Springer Nature journal article supplement (https://www.springermedizin.de/resource/supplementary/13058_2012_3187_MOESM5_ESM.pdf/9703462)

### A Vehicle

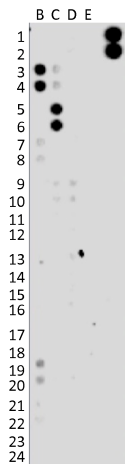

### Ligands

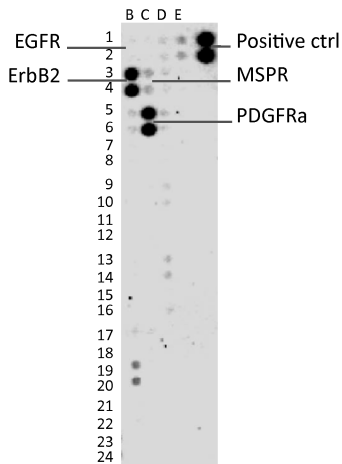

### B

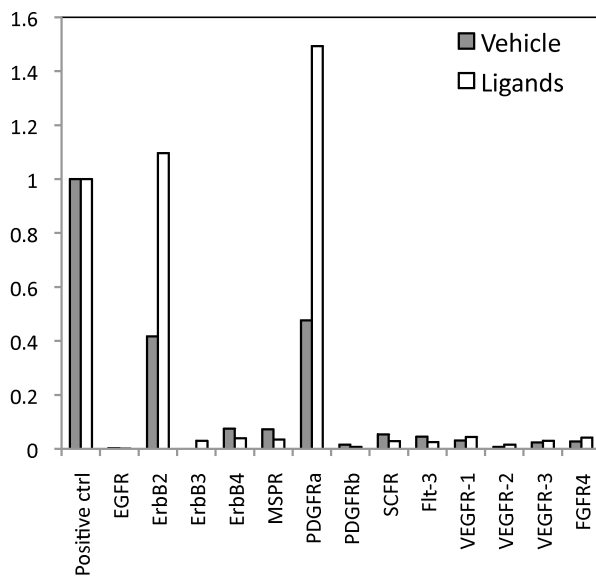

### C Vehicle

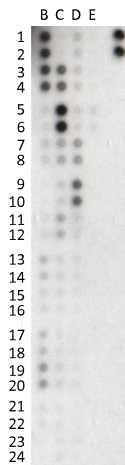

### TKI258

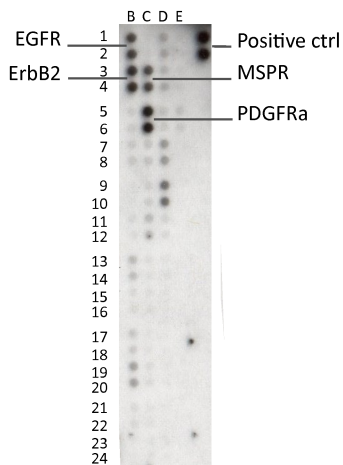

### D

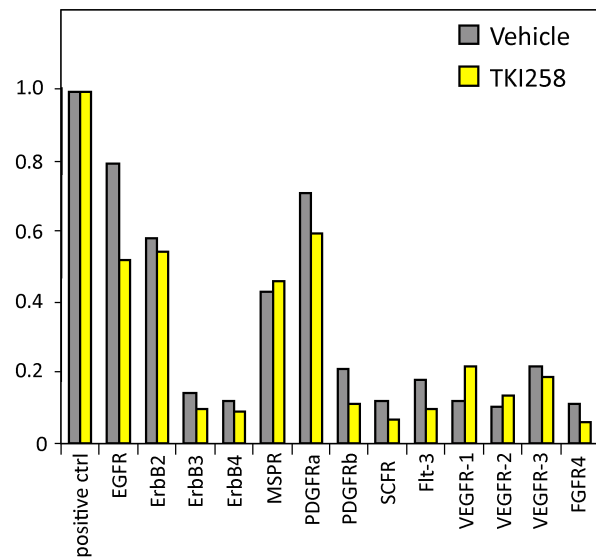

Supplement: MOESM5 [file 9703462]
